# Supplementary material for: Immune cell counts and risks of respiratory infections among infants exposed pre- and postnatally to organochlorine compounds: a prospective study
Source: PubMed Central journal article supplement (PMC2637846; doi:10.1186/1476-069x-7-62), 2008-12-04
Supplement: 1476-069X-7-62-S1.pdf [file 1476-069X-7-62-S1.pdf]

Table A. Unadjusted means ( $\pm$ SE) of white blood cell numbers ( $\times 10^9/L$ ) in 3 month old infants exposed to organochlorines postnatally<sup>a</sup>

|                            | White blood cells | Neutrophils     | Eosinophils     | Lymphocytes     | Monocytes       |
|----------------------------|-------------------|-----------------|-----------------|-----------------|-----------------|
| CB 28+52+101 postnatal     |                   |                 |                 |                 |                 |
| 0-5.5 ng/g fw*days         | 7.65 $\pm$ 0.39   | 1.66 $\pm$ 0.13 | 0.32 $\pm$ 0.03 | 5.13 $\pm$ 0.31 | 0.35 $\pm$ 0.04 |
| 5.6-11.8                   | 8.21 $\pm$ 0.40   | 1.82 $\pm$ 0.13 | 0.32 $\pm$ 0.03 | 5.52 $\pm$ 0.32 | 0.34 $\pm$ 0.04 |
| 11.9-76.3                  | 8.67 $\pm$ 0.41   | 1.49 $\pm$ 0.14 | 0.28 $\pm$ 0.03 | 6.00 $\pm$ 0.33 | 0.40 $\pm$ 0.04 |
| CB-153 postnatal           |                   |                 |                 |                 |                 |
| 0-120 ng/g fw*days         | 8.30 $\pm$ 0.41   | 1.78 $\pm$ 0.18 | 0.32 $\pm$ 0.03 | 5.55 $\pm$ 0.32 | 0.36 $\pm$ 0.04 |
| 121-209                    | 8.09 $\pm$ 0.41   | 1.98 $\pm$ 0.18 | 0.30 $\pm$ 0.03 | 5.34 $\pm$ 0.33 | 0.35 $\pm$ 0.04 |
| 210-396                    | 8.10 $\pm$ 0.41   | 1.54 $\pm$ 0.18 | 0.29 $\pm$ 0.03 | 5.74 $\pm$ 0.33 | 0.37 $\pm$ 0.04 |
| Di-ortho PCB postnatal     |                   |                 |                 |                 |                 |
| 0-267 ng/g fw*days         | 8.33 $\pm$ 0.39   | 1.63 $\pm$ 0.14 | 0.33 $\pm$ 0.03 | 5.63 $\pm$ 0.31 | 0.37 $\pm$ 0.04 |
| 268-412                    | 8.11 $\pm$ 0.41   | 1.83 $\pm$ 0.14 | 0.29 $\pm$ 0.03 | 5.29 $\pm$ 0.33 | 0.36 $\pm$ 0.04 |
| 413-830                    | 8.02 $\pm$ 0.43   | 1.48 $\pm$ 0.14 | 0.30 $\pm$ 0.03 | 5.70 $\pm$ 0.35 | 0.36 $\pm$ 0.04 |
| Mono-ortho PCB postnatal   |                   |                 |                 |                 |                 |
| 0-8.2 pg TEQ/g fw*days     | 8.13 $\pm$ 0.39   | 1.65 $\pm$ 0.13 | 0.34 $\pm$ 0.03 | 5.58 $\pm$ 0.30 | 0.36 $\pm$ 0.04 |
| 8.3-12.1                   | 8.28 $\pm$ 0.40   | 1.85 $\pm$ 0.14 | 0.30 $\pm$ 0.03 | 5.26 $\pm$ 0.32 | 0.37 $\pm$ 0.04 |
| 12.2-26.0                  | 8.07 $\pm$ 0.42   | 1.43 $\pm$ 0.15 | 0.26 $\pm$ 0.03 | 5.84 $\pm$ 0.36 | 0.34 $\pm$ 0.04 |
| <i>p,p'</i> -DDE postnatal |                   |                 |                 |                 |                 |
| 0-211 ng/g fw*days         | 8.18 $\pm$ 0.39   | 1.80 $\pm$ 0.13 | 0.35 $\pm$ 0.03 | 5.41 $\pm$ 0.30 | 0.37 $\pm$ 0.04 |
| 212-413                    | 8.00 $\pm$ 0.42   | 1.63 $\pm$ 0.15 | 0.31 $\pm$ 0.03 | 5.23 $\pm$ 0.33 | 0.34 $\pm$ 0.04 |
| 414-2199                   | 8.32 $\pm$ 0.43   | 1.49 $\pm$ 0.14 | 0.24 $\pm$ 0.03 | 6.05 $\pm$ 0.34 | 0.37 $\pm$ 0.04 |

<sup>a</sup> Infants with an ongoing infection at the time of sampling were excluded, as well as infants that had an infection within 7 days before sampling. Postnatal exposure: breast milk levels (ng or pg/g fresh weight)\*days of nursing\*(%of full nursing/100). CB 28+52+101=CB-28, CB-52, CB-101; Di-ortho PCB=CB-138, CB-153, CB-180; Mono-ortho PCB TEQ=CB-105, CB-118, CB-156, CB-167 [32]. N=74-75.

\* $p \leq 0.01$
