# Supplementary material for: Immune cell counts and risks of respiratory infections among infants exposed pre- and postnatally to organochlorine compounds: a prospective study
Source: PubMed Central journal article supplement (PMC2637846; doi:10.1186/1476-069x-7-62), 2008-12-04
Supplement: 1476-069X-7-62-S5.pdf [file 1476-069X-7-62-S5.pdf]

Table E. Odds ratios (95% CI) for associations between respiratory infections, lasting 3 days or more during the first 3 months after birth, and pre- or postnatal exposure to organochlorine compounds<sup>a</sup>

|                            | Model <sup>b</sup> | Exposure categories <sup>c</sup> |                   |                   |                   |
|----------------------------|--------------------|----------------------------------|-------------------|-------------------|-------------------|
|                            |                    | Category 1                       | Category 2        | Category 3        | Category 4        |
| <b>Prenatal</b>            |                    |                                  |                   |                   |                   |
| CB 28+52+101               | Multivariate       | 1.0                              | 2.1 (0.85-5.1)    | 3.3 (1.4-7.9)*    |                   |
| CB-153                     | Multivariate       | 1.0                              | 0.42 (0.15-1.2)   | 0.28 (0.09-0.85)* | 0.43 (0.12-1.5)   |
| Di- <i>ortho</i> PCB       | Multivariate       | 1.0                              | 0.28 (0.10-0.80)* | 0.23 (0.07-0.73)* | 0.32 (0.09-1.1)   |
| Mono- <i>ortho</i> PCB TEQ | Multivariate       | 1.0                              | 0.42 (0.15-1.2)   | 0.36 (0.11-1.2)   | 0.28 (0.07-1.1)   |
| <b>Postnatal</b>           |                    |                                  |                   |                   |                   |
| CB-153                     | Multivariate       | 1.0                              | 0.43 (0.14-1.3)   | 0.41 (0.13-1.3)   | 0.24 (0.07-0.86)* |
| Di- <i>ortho</i> PCB       | Multivariate       | 1.0                              | 0.27 (0.08-0.89)* | 0.31 (0.10-1.0)   | 0.17 (0.05-0.61)* |
| Mono- <i>ortho</i> PCB TEQ | Multivariate       | 1.0                              | 0.26 (0.08-0.88)* | 0.46 (0.14-1.4)   | 0.33 (0.10-1.2)   |
| <i>p,p'</i> -DDE           | Multivariate       | 1.0                              | 0.17 (0.05-0.60)* | 0.48 (0.16-1.4)   | 0.64 (0.21-1.9)   |

<sup>a</sup>Prenatal exposure: Lipid adjusted mother's serum organochlorine compound concentrations in late pregnancy (week 32-34). Postnatal exposure: mother's milk concentrations on a fresh weight basis\*days of nursing\*(%of full nursing/100). Di-*ortho* PCB=CB-138, CB-153, CB-180; Mono-*ortho* PCB TEQ=CB-105, CB-118, CB-156, CB-167 [32]. Prenatal exposure:N=190. Postnatal exposure:N=175. Statistical analyses were performed when statistically significant associations between organochlorine compound exposure and infection risk were found (see Table 5).

<sup>b</sup>Multivariate model included the independent variables age of the mother, smoking and alcohol during pregnancy, mother's education, vaccination of the infant, nursing of the infant, and age of the infant.

<sup>c</sup>Pre- and postnatal exposure was categorized with the lowest exposure in Category 1 and increasing exposure with increasing Category number. Efforts were made to have equal numbers of participants in the exposure categories for each compound group.

\*Significantly different from the odds ratio of the reference category ( $p \leq 0.05$ ).
